# Supplementary material for: Helmet CPAP: how an unfamiliar respiratory tool is moving into treatment options during COVID-19 in the US
Source: PubMed Central journal article supplement — Ther Adv Respir Dis. 2020 Aug 30;14:1753466620951032. doi: 10.1177/1753466620951032 (PMC7466885; doi:10.1177/1753466620951032), 2020-08-30
Supplement: Reviewer_1_v.1.pdf [file Reviewer_1_v.1.pdf]

Reviewer 1, v.1

Comments to the Author

Dear authors

I would like to congratulate with all of you for the letter and the program to start helmet CPAP in your country and hospital.

I have only few minor comment:

1) may you provide numbers of patients that you treated to date, with your success rate?

2) in the literature, there is evidence to attempt also prone position during CPAP (see for example the Italian paper recently published - PMID: 32386886). Was it considered as treatment option? please discuss it.
