# Supplementary material for: Helmet CPAP: how an unfamiliar respiratory tool is moving into treatment options during COVID-19 in the US
Source: PubMed Central journal article supplement — Ther Adv Respir Dis. 2020 Aug 30;14:1753466620951032. doi: 10.1177/1753466620951032 (PMC7466885; doi:10.1177/1753466620951032), 2020-08-30
Supplement: Reviewer_2_v.1.pdf [file Reviewer_2_v.1.pdf]

Reviewer 2, v.1

Comments to the Author

In this article, the authors report on their experience with the introduction of CPAP helmet in the treatment of L ARDS in COVID patients.

This method, using a helmet, avoids aerosolization of the virus. This article focuses on the timeline of acceptance of this treatment by the FDA and its introduction in the United States. This point of view is interesting and well defended.

This treatment would make it possible to avoid intubation in patients with acute respiratory distress syndrome linked to Covid 19.

Since it has recently been shown that this syndrome does not correspond to ARDS but to disseminated vasculitis.

It would be more appropriate to cite a reference that refers to COVID 19 , rather than ARDS .

1. Gimbada Benny Mwenge, Daniel Rodenstein. CPAP Added to Oxygen Administration Avoid Intubation in Acute Respiratory Distress in COVID-19 Pneumonia. Case Report. SN Compr Clin Med. 2020 Jun 18 : 1-4. doi: 10.1007/s42399-020-00349-2 [Epub ahead of print]
